# Supplementary material for: Change in lipid profile and risk of new-onset atrial fibrillation in patients with chronic heart failure: A 3-year follow-up observational study in a large Chinese hospital
Source: PubMed Central journal article supplement — Medicine (Baltimore). 2018 Sep 28;97(39):e12485. doi: 10.1097/MD.0000000000012485 (PMC6181553; doi:10.1097/md.0000000000012485), 2018-09-28
Supplement: medi-97-e12485-s001.pdf [file medi-97-e12485-s001.pdf]

**Change in lipid profile and risk of new-onset atrial fibrillation in patients with chronic heart failure: A 3-year follow-up observational study in a large Chinese hospital**

Chen Liu, et al.

This supplement contains the following items:

**Table S1.** Clinical parameters at baseline and at the 1-year follow-up

**Table S2.** Characteristics of 188 patients with sinus rhythm at the 1-year follow-up, stratified according to the difference in total cholesterol levels ( $\Delta$ TC) between baseline and the 1-year follow-up

**Table S3.** Characteristics of 188 patients with sinus rhythm at the 1-year follow-up, stratified according to the difference in low-density lipoprotein cholesterol levels ( $\Delta$ LDLc) between baseline and the 1-year follow-up

**Table S4.** Characteristics of 188 patients with sinus rhythm at the 1-year follow-up, stratified according to the difference in high-density lipoprotein cholesterol levels ( $\Delta$ HDLc) between baseline and the 1-year follow-up

**Table S1. Clinical parameters at baseline and at the 1-year follow-up**

| Variable                    |           | SR group<br>(n = 213) | AF group<br>(n = 78) | <i>P</i> *-value |
|-----------------------------|-----------|-----------------------|----------------------|------------------|
| NYHA class                  |           |                       |                      |                  |
| IV                          | Baseline  | 102 (47.9%)           | 57 (73.1%)           | <.001            |
|                             | Follow-up | 87 (40.8%)            | 50 (64.1%)           | .0004            |
|                             | <i>P</i>  | .14                   | .22                  |                  |
| Use of medications          |           |                       |                      |                  |
| Statins                     | Baseline  | 15 (7%)               | 6 (7.7%)             | .84              |
|                             | Follow-up | 21 (9.8%)             | 8 (10.2%)            | .92              |
|                             | <i>P</i>  | .38                   | .78                  |                  |
| Fibrates                    | Baseline  | 15 (7%)               | 3 (3.8%)             | .31              |
|                             | Follow-up | 12 (5.6%)             | 6 (7.7%)             | .51              |
|                             | <i>P</i>  | .55                   | .30                  |                  |
| Aspirin                     | Baseline  | 174 (81.7%)           | 66 (84.6%)           | .56              |
|                             | Follow-up | 158 (74.1%)           | 62 (79.4%)           | .35              |
|                             | <i>P</i>  | .06                   | .40                  |                  |
| Clopidogrel                 | Baseline  | 78 (36.6%)            | 30 (38.4%)           | .77              |
|                             | Follow-up | 84 (39.4%)            | 28 (35.9%)           | .58              |
|                             | <i>P</i>  | .54                   | .74                  |                  |
| ACEI                        | Baseline  | 180 (84.5%)           | 72 (92.3%)           | .08              |
|                             | Follow-up | 168 (78.8%)           | 66 (84.6%)           | .27              |
|                             | <i>P</i>  | .13                   | .13                  |                  |
| Furosemide                  | Baseline  | 168 (78.9%)           | 57 (73.07%)          | .29              |
|                             | Follow-up | 183 (85.9%)           | 66 (84.6%)           | .77              |
|                             | <i>P</i>  | .06                   | .07                  |                  |
| Spironolactone              | Baseline  | 168 (78.9%)           | 62 (79.4%)           | .90              |
|                             | Follow-up | 167 (78.4%)           | 63 (80.7%)           | .66              |
|                             | <i>P</i>  | .90                   | .84                  |                  |
| Nitrates                    | Baseline  | 186 (87.3%)           | 63 (80.8%)           | .15              |
|                             | Follow-up | 173 (81.2%)           | 60 (76.9%)           | .41              |
|                             | <i>P</i>  | .08                   | .55                  |                  |
| Calcium-channel<br>blockers | Baseline  | 9 (4.2%)              | 4 (5.1%)             | .74              |
|                             | Follow-up | 15 (7%)               | 6(7.6%)              | .84              |
|                             | <i>P</i>  | .20                   | .51                  |                  |
| Amiodarone                  | Baseline  | 6 (3.4%)              | 3 (3.8%)             | .65              |
|                             | Follow-up | 8 (3.7%)              | 4 (5.1%)             | .60              |
|                             | <i>P</i>  | .58                   | .69                  |                  |
| β-blockers                  | Baseline  | 192 (90.1%)           | 72 (92.3%)           | .57              |
|                             | Follow-up | 182 (85.4%)           | 67 (85.8%)           | .92              |
|                             | <i>P</i>  | .13                   | .19                  |                  |
| TC, mg/dL                   | Baseline  | 149.48±43.41          | 153.57±38.43         | .43              |
|                             | Follow-up | 152.24±38.99          | 129.62±30.14         | <.01             |

|                             |           |             |              |      |
|-----------------------------|-----------|-------------|--------------|------|
|                             | <i>P</i>  | .50         | <.01         |      |
| LDLc, mg/dL                 | Baseline  | 93.18±32.06 | 90.89±32.33  | .59  |
|                             | Follow-up | 85.38±32.38 | 67.53±25.68  | <.01 |
|                             | <i>P</i>  | .04         | <.01         |      |
| HDLc, mg/dL                 | Baseline  | 44.48±6.62  | 47.42±6.14   | .20  |
|                             | Follow-up | 39.38±4.93  | 41.71±5.29   | .43  |
|                             | <i>P</i>  | <.01        | .01          |      |
| TG, mg/dL                   | Baseline  | 54.12±11.92 | 51.26±10.20  | .06  |
|                             | Follow-up | 59.86±15.85 | 54.88±12.55  | .06  |
|                             | <i>P</i>  | .11         | .65          |      |
| TSH, mIU/L                  | Baseline  | 2.84±4.5    | 2.5±2.19     | .52  |
|                             | Follow-up | 2.28±3.13   | 2.63±2.27    | .36  |
|                             | <i>P</i>  | .13         | .71          |      |
| FT3, pmol/L                 | Baseline  | 4.48±0.64   | 4.30±0.87    | .06  |
|                             | Follow-up | 4.12±0.93   | 4.12±0.49    | .95  |
|                             | <i>P</i>  | .06         | .11          |      |
| FT4, pmol/L                 | Baseline  | 13.75±3.55  | 13.05±3.65   | .14  |
|                             | Follow-up | 13.08±4.42  | 12.96±3.02   | .80  |
|                             | <i>P</i>  | .08         | .86          |      |
| Serum creatinine,<br>µmol/L | Baseline  | 92.98±35.54 | 103.88±71.48 | .08  |
|                             | Follow-up | 96.18±35.54 | 104.80±40.95 | .07  |
|                             | <i>P</i>  | .35         | .92          |      |
| LVEF, %                     | Baseline  | 44.45±10.34 | 42.16±12.37  | .11  |
|                             | Follow-up | 43.80±14.09 | 41.84±19.68  | .34  |
|                             | <i>P</i>  | .58         | .90          |      |
| LAD, mm                     | Baseline  | 42.14±5.28  | 41.14±5.08   | .14  |
|                             | Follow-up | 43.32±7.86  | 41.76±13.35  | .22  |
|                             | <i>P</i>  | .06         | .45          |      |
| LVEDD, mm                   | Baseline  | 65.30±7.84  | 67.14±12.46  | .13  |
|                             | Follow-up | 66.39±9.91  | 67.38±19.75  | .57  |
|                             | <i>P</i>  | .20         | .92          |      |

Patients were stratified according to whether new-onset AF was noted at the 1-year follow-up (AF vs. SR group). Within-group differences between baseline and the 1-year follow-up were evaluated using the chi-square test for categorical variables and the paired t-test for continuous variables. Data are given as mean ± standard deviation or number (percentage). The statistical significance is calculated for differences between baseline and 1-year follow-up (within-group comparison, *P*) and between the SR group and AF group (between-group comparison, *P*<sup>\*</sup>).

NYHA class, New York Heart Association class; LVEF, left ventricular ejection fraction; ACEI, angiotensin converting enzyme inhibitor; TC, total cholesterol; LDLc, low-density lipoprotein cholesterol; HDLc, high-density lipoprotein cholesterol; TG, triglycerides; TSH, thyroid stimulating hormone; FT3, serum free triiodothyronine; FT4, serum free thyroxine; LAD, left atrial diameter; LVEDD, left ventricular end-diastolic dimension

**Table S2. Characteristics of 188 patients with sinus rhythm at the 1-year follow-up, stratified according to the difference in total cholesterol levels ( $\Delta$ TC) between baseline and the 1-year follow-up**

| Variable                        | Low $\Delta$ TC (n = 94)<br>( $<9.65$ mg/dL) | High $\Delta$ TC (n = 94)<br>( $>9.65$ mg/dL) | <i>P</i> -value |
|---------------------------------|----------------------------------------------|-----------------------------------------------|-----------------|
| Age, years                      | 72.1 $\pm$ 9.15                              | 70.8 $\pm$ 9.86                               | .35             |
| Female sex                      | 35 (37.2%)                                   | 44 (46.8%)                                    | .18             |
| NYHA class                      |                                              |                                               | .30             |
| III                             | 52 (55.3%)                                   | 45 (47.8%)                                    |                 |
| IV                              | 42 (44.7%)                                   | 49 (52.2%)                                    |                 |
| Heart failure with reduced LVEF | 70 (74.4%)                                   | 72 (76.5%)                                    | .73             |
| LVEF, %                         | 44.26 $\pm$ 11.21                            | 42.72 $\pm$ 11.18                             | .34             |
| Hypertension                    | 70 (74.4%)                                   | 62 (65.9%)                                    | .20             |
| Diabetes mellitus               | 23 (24.4%)                                   | 24 (25.5%)                                    | .86             |
| Ischemic heart disease          | 73 (77.6%)                                   | 71 (75.5%)                                    | .73             |
| Cerebrovascular disease         | 18 (19.1%)                                   | 14 (14.8%)                                    | .43             |
| Smoking                         | 17 (18%)                                     | 19 (20.2%)                                    | .71             |
| Alcohol consumption             | 5 (5.3%)                                     | 7 (7.4%)                                      | .55             |
| Use of medications              |                                              |                                               |                 |
| Statins                         | 9 (9.5%)                                     | 8 (8.5%)                                      | .79             |
| Fibrates                        | 4 (4.2%)                                     | 6 (6.3%)                                      | .51             |
| Aspirin                         | 65 (69.1%)                                   | 71 (75.5%)                                    | .32             |
| Clopidogrel                     | 32 (34%)                                     | 37 (39.3%)                                    | .44             |
| ACEI                            | 73 (77.6%)                                   | 75 (79.7%)                                    | .72             |
| Furosemide                      | 91 (96.8%)                                   | 89 (94.6%)                                    | .46             |
| Spironolactone                  | 72 (76.5%)                                   | 78 (82.9%)                                    | .27             |
| Nitrates                        | 74 (78.7%)                                   | 78 (82.9%)                                    | .45             |
| Calcium-channel blockers        | 5 (5.3%)                                     | 6 (6.3%)                                      | .75             |
| Amiodarone                      | 4 (4.2%)                                     | 3 (3.1%)                                      | .70             |
| $\beta$ -blockers               | 80 (85.1%)                                   | 83 (88.2%)                                    | .52             |

Differences ( $\Delta$ ) were calculated by subtracting the values noted at the 1-year follow-up from those noted at baseline. Data are given as mean  $\pm$  standard deviation or number (percentage).

TC, total cholesterol; NYHA class, New York Heart Association class; LVEF, left ventricular ejection fraction; ACEI, angiotensin converting enzyme inhibitor

◦  
**Table S3. Characteristics of 188 patients with sinus rhythm at the 1-year follow-up, stratified according to the difference in low-density lipoprotein cholesterol levels ( $\Delta$ LDLc) between baseline and the 1-year follow-up**

| Variable                        | Low $\Delta$ LDLc (n = 94)<br>( $<9.73$ mg/dL) | High $\Delta$ LDLc (n = 94)<br>( $>9.73$ mg/dL) | <i>P</i> -value |
|---------------------------------|------------------------------------------------|-------------------------------------------------|-----------------|
| Age, years                      | 72.2 $\pm$ 9.12                                | 70.7 $\pm$ 9.36                                 | .26             |
| Female sex                      | 37 (39.3%)                                     | 42 (44.6%)                                      | .46             |
| NYHA class                      |                                                |                                                 | .66             |
| III                             | 50 (53.1%)                                     | 47 (50%)                                        |                 |
| IV                              | 44 (46.9%)                                     | 47 (50%)                                        |                 |
| Heart failure with reduced LVEF | 69 (73.4%)                                     | 73 (77.6%)                                      | .49             |
| LVEF, %                         | 43.95 $\pm$ 10.76                              | 42.97 $\pm$ 10.43                               | .52             |
| Hypertension                    | 68 (72.3%)                                     | 64 (68%)                                        | .52             |
| Diabetes mellitus               | 22 (23.4%)                                     | 25 (26.5%)                                      | .61             |
| Ischemic heart disease          | 74 (78.7%)                                     | 70 (74.4%)                                      | .49             |
| Cerebrovascular disease         | 17 (18%)                                       | 15 (15.9%)                                      | .69             |
| Smoking                         | 17 (18%)                                       | 19 (20.2%)                                      | .71             |
| Alcohol consumption             | 5 (5.3%)                                       | 7 (7.4%)                                        | .55             |
| Use of medications              |                                                |                                                 |                 |
| Statins                         | 8 (8.5%)                                       | 9 (9.5%)                                        | .79             |
| Fibrates                        | 4 (4.2%)                                       | 6 (6.3%)                                        | .51             |
| Aspirin                         | 66 (70.2%)                                     | 70 (74.4%)                                      | .51             |
| Clopidogrel                     | 34 (36.1%)                                     | 35 (37.2%)                                      | .88             |
| ACEI                            | 72 (76.5%)                                     | 76 (80.8%)                                      | .47             |
| Furosemide                      | 91 (96.8%)                                     | 89 (94.6%)                                      | .46             |
| Spironolactone                  | 73 (77.6%)                                     | 77 (81.9%)                                      | .46             |
| Nitrates                        | 75 (79.7%)                                     | 77 (81.9%)                                      | .71             |
| Calcium-channel blockers        | 6 (6.3%)                                       | 5 (5.3%)                                        | .75             |
| Amiodarone                      | 4 (4.2%)                                       | 3 (3.1%)                                        | .70             |
| $\beta$ -blockers               | 81 (86.1%)                                     | 82 (87.2%)                                      | .83             |

Differences ( $\Delta$ ) were calculated by subtracting the values noted at the 1-year follow-up from those noted at baseline. Data are given as mean  $\pm$  standard deviation or number (percentage).

LDLc, low-density lipoprotein cholesterol; NYHA class, New York Heart Association class; LVEF, left ventricular ejection fraction; ACEI, angiotensin converting enzyme inhibitor

**Table S4. Characteristics of 188 patients with sinus rhythm at the 1-year follow-up, stratified according to the difference in high-density lipoprotein cholesterol levels ( $\Delta$ HDLc) between baseline and the 1-year follow-up**

| Variable                        | Low $\Delta$ HDLc (n = 94)<br>( $<3.72$ mg/dL) | High $\Delta$ HDLc (n = 94)<br>( $>3.72$ mg/dL) | <i>P</i> -value |
|---------------------------------|------------------------------------------------|-------------------------------------------------|-----------------|
| Age, years                      | 71.7 $\pm$ 9.03                                | 71 $\pm$ 9.12                                   | .59             |
| Female sex                      | 38 (40.4%)                                     | 41 (43.6%)                                      | .65             |
| NYHA class                      |                                                |                                                 | .88             |
| III                             | 48 (51%)                                       | 49 (52.1%)                                      |                 |
| IV                              | 46 (48.9%)                                     | 45 (47.8%)                                      |                 |
| Heart failure with reduced LVEF | 68 (72.3%)                                     | 74 (78.7%)                                      | .30             |
| LVEF, %                         | 44.12 $\pm$ 10.13                              | 43.65 $\pm$ 10.72                               | .75             |
| Hypertension                    | 67 (71.2%)                                     | 65 (69.1%)                                      | .74             |
| Diabetes mellitus               | 23 (24.4%)                                     | 24 (25.5%)                                      | .86             |
| Ischemic heart disease          | 69 (73.4%)                                     | 75 (79.7%)                                      | .30             |
| Cerebrovascular disease         | 15 (15.9%)                                     | 17 (18%)                                        | .43             |
| Smoking                         | 19 (20%)                                       | 17 (18%)                                        | .71             |
| Alcohol consumption             | 5 (5.3%)                                       | 7 (7.4%)                                        | .55             |
| Use of medications              |                                                |                                                 |                 |
| Statins                         | 9 (9.5%)                                       | 8 (8.5%)                                        | .80             |
| Fibrates                        | 4 (4.2%)                                       | 6 (6.3%)                                        | .51             |
| Aspirin                         | 67 (71.2%)                                     | 69 (73.4%)                                      | .74             |
| Clopidogrel                     | 33 (35.1%)                                     | 36 (38.2%)                                      | .65             |
| ACEI                            | 75 (79.7%)                                     | 73 (77.6%)                                      | .72             |
| Furosemide                      | 92 (97.8%)                                     | 88 (93.6%)                                      | .14             |
| Spironolactone                  | 74 (78.7%)                                     | 76 (80.8%)                                      | .71             |
| Nitrates                        | 74 (78.7%)                                     | 78 (82.9%)                                      | .45             |
| Calcium-channel blockers        | 6 (6.3%)                                       | 5 (5.3%)                                        | .75             |
| Amiodarone                      | 4 (4.2%)                                       | 3 (3.1%)                                        | .70             |
| $\beta$ -blockers               | 83 (88.2%)                                     | 80 (85.1%)                                      | .51             |

Differences ( $\Delta$ ) were calculated by subtracting the values noted at the 1-year follow-up from those noted at baseline. Data are given as mean  $\pm$  standard deviation or number (percentage).

$\Delta$ HDLc, high-density lipoprotein cholesterol; NYHA class, New York Heart Association class; LVEF, left ventricular ejection fraction; ACEI, angiotensin converting enzyme inhibitor
